# Supplementary material
Source: PubMed Central journal article supplement (PMC3536727)
Supplement: chan-6-426-s01.pdf [file chan-6-426-s01.pdf]

## **Supplemental Material to:**

**Sharon Weiss, Tal Keren-Raifman, Shimrit Oz, Adva Ben Mocha, Hannelore Haase and Nathan Dascal**

**Modulation of distinct isoforms of L-type calcium channels by Gq-coupled receptors in *Xenopus oocytes*:  
Antagonistic effects of G $\beta$  $\gamma$  and protein kinase C**

**Channels 2012; 6 (6)**

**<http://dx.doi.org/10.4161/chan.22016>**

**<http://www.landesbioscience.com/journals/channels/article/22016/>**

| Channel composition                                     | <i>n</i> | <i>G</i> <sub>max</sub> $\mu S$ | <i>V</i> <sub>rev</sub> <i>mV</i> | <i>V</i> <sub>o</sub> <i>mV</i> | <i>K</i> <sub>o</sub> <i>mV</i> |
|---------------------------------------------------------|----------|---------------------------------|-----------------------------------|---------------------------------|---------------------------------|
| $\alpha_{1C}$ -LNT, $\alpha_2\delta$                    | 14       | 6.3 $\pm$ 1                     | 66.5 $\pm$ 2                      | 9.7 $\pm$ 1                     | 8.4 $\pm$ 0.3                   |
| $\alpha_{1C}$ -LNT, $\alpha_2\delta$ , $\beta_{2b}$     | 12       | 40.2 $\pm$ 8.4                  | 63.1 $\pm$ 1.8                    | -4.8 $\pm$ 1.1                  | 6.7 $\pm$ 0.3                   |
| $\alpha_{1C}$ -LNT,+9a, $\alpha_2\delta$                | 14       | 7.8 $\pm$ 1.5                   | 72.7 $\pm$ 6.2                    | 10.6 $\pm$ 0.4                  | 8.4 $\pm$ 0.2                   |
| $\alpha_{1C}$ -LNT,+9a, $\alpha_2\delta$ , $\beta_{2b}$ | 20       | 41.0 $\pm$ 5.6                  | 62.8 $\pm$ 1.6                    | -4.8 $\pm$ 0.8                  | 6.8 $\pm$ 0.2                   |
| $\alpha_{1C}$ -SNT, $\alpha_2\delta$                    | 7        | 20.68 $\pm$ 5.5                 | 65.2 $\pm$ 1.9                    | 5.1 $\pm$ 0.3                   | 8.2 $\pm$ 0.5                   |
| $\alpha_{1C}$ -SNT, $\alpha_2\delta$ , $\beta_{2b}$     | 6        | 51.4 $\pm$ 11.9                 | 61.2 $\pm$ 1                      | -11.6 $\pm$ 1.8                 | 6.3 $\pm$ 0.5                   |
| $\alpha_{1C}$ -SNT,+9a, $\alpha_2\delta$                | 8        | 37.2 $\pm$ 13.4                 | 74.8 $\pm$ 6.8                    | 2.6 $\pm$ 0.6                   | 8.7 $\pm$ 0.8                   |
| $\alpha_{1C}$ -SNT,+9a, $\alpha_2\delta$ , $\beta_{2b}$ | 12       | 43.6 $\pm$ 9.9                  | 60.3 $\pm$ 0.5                    | -9.8 $\pm$ 1.4                  | 6.5 $\pm$ 0.2                   |

| Voltage | isoform                      | $\tau_{slow}$ <i>ms</i> | <i>A</i> <sub>slow</sub> | $\tau_{fast}$ <i>ms</i> | <i>A</i> <sub>fast</sub> | <i>C</i>         |
|---------|------------------------------|-------------------------|--------------------------|-------------------------|--------------------------|------------------|
| 0mV     | $\alpha_{1C}$ -LNT (n=5)     | 2571 $\pm$ 52           | 0.42 $\pm$ 0.01          | 844 $\pm$ 46            | 0.37 $\pm$ 0.03          | 0.21 $\pm$ 0.02  |
|         | $\alpha_{1C}$ -LNT,+9a (n=6) | 4138 $\pm$ 707          | 0.35 $\pm$ 0.03          | 987 $\pm$ 66            | 0.52 $\pm$ 0.08          | 0.12 $\pm$ 0.06  |
| 20mV    | $\alpha_{1C}$ -LNT (n=5)     | 2056 $\pm$ 95           | 0.46 $\pm$ 0.02          | 634 $\pm$ 33            | 0.44 $\pm$ 0.03          | 0.103 $\pm$ 0.01 |
|         | $\alpha_{1C}$ -LNT,+9a (n=6) | 2672 $\pm$ 225          | 0.46 $\pm$ 0.02          | 619 $\pm$ 62            | 0.44 $\pm$ 0.03          | 0.103 $\pm$ 0.02 |
| 40mV    | $\alpha_{1C}$ -LNT (5)       | 2148 $\pm$ 152          | 0.51 $\pm$ 0.02          | 490 $\pm$ 43            | 0.45 $\pm$ 0.03          | 0.04 $\pm$ 0.02  |
|         | $\alpha_{1C}$ -LNT,+9a (n=6) | 2577 $\pm$ 258          | 0.55 $\pm$ 0.01          | 377 $\pm$ 68            | 0.39 $\pm$ 0.03          | 0.06 $\pm$ 0.03  |

Weiss 2012. Supplemental Table 1

|                                                                       |                                                         |                    |     |
|-----------------------------------------------------------------------|---------------------------------------------------------|--------------------|-----|
| MLRALVQPATPAYQPLPSHLSAETE                                             | <b><u>ST</u></b> CKGTWHEAQLNHFYISPGG                    | <b><u>S</u></b> NY | 50  |
| <b><u>G</u></b> SPRPAHANMNANAAAGLAPEHIP                               | <b><u>T</u></b> PGAALSWQAAIDAARQAKLMGSAGN               |                    | 100 |
| AT <b><u>I</u></b> <b><u>STV</u></b> <b><u>SS</u></b> TQRKRQQYGKPKKQG | <b><u>S</u></b> TTATRPPRALLCLTLKNPIRRAC <b><u>I</u></b> |                    | 150 |
| VEWKPF $\bar{E}$ III                                                  |                                                         |                    | 160 |

Weiss 2012. Supplemental Figure 1

**A**

```
Rabbit SM,  $\alpha_{1C_b}$       gaggcactccagcgggcttgcatgccagaagaaaggaagtttgcttggttagtcact 1450
|||||  |||||  |||  ||  |||||  |||||  |||||  |||||  |||||  |||||  |||||  |||||  |||||  |||||  |||||  |||||
Human chromosome 12 gaggcactccggcgggcatgcttgatcagaagaaaggaagtttgcttggttagtcact 2510936

Rabbit SM,  $\alpha_{1C_b}$       ccacagagacccatg 1472
|||||  |||||  |||||
Human chromosome 12 ccacagaaacccatg 2510951
```

**B**

```
 $\alpha_{1C}$ , NT-rabbit long    GEFSKEREKAKARGDFQKLREKQQLEEDLKGYLDWITQAEDIDPENEDEGMDEEKPRN-- 493
 $\alpha_{1C,77}$ , NT-human short GEFSKEREKAKARGDFQKLREKQQLEEDLKGYLDWITQAEDIDPENEDEGMDEEKPRN-- 463
 $\alpha_{1C_b}$ , rabbit SM      GEFSKEREKAKARGDFQKLREKQQLEEDLKGYLDWITQAEDIDPENEDEGMDEEKPRNRG 465
*****

 $\alpha_{1C}$ , NT-rabbit long    -----MSMPTSETESVNTENVAGGDIEGENCGARLAHRISKS 530
 $\alpha_{1C,77}$ , NT-human short -----MSMPTSETESVNTENVAGGDIEGENCGARLAHRISKS 500
 $\alpha_{1C_b}$ , rabbit SM      TPAGLHAQKKGKFAWFHSTETHVSMPTSETESVNTENVAGGDIEGENCGARLAHRISKS 525
                               :*****

 $\alpha_{1C}$ , NT-rabbit long    KFSRYWRRWNRFCRRKCRAAVKSN 554
 $\alpha_{1C,77}$ , NT-human short KFSRYWRRWNRFCRRKCRAAVKSN 524
 $\alpha_{1C_b}$ , rabbit SM      KFSRYWRRWNRFCRRKCRAAVKSN 549
*****
```

Weiss 2012. Supplemental Figure 2

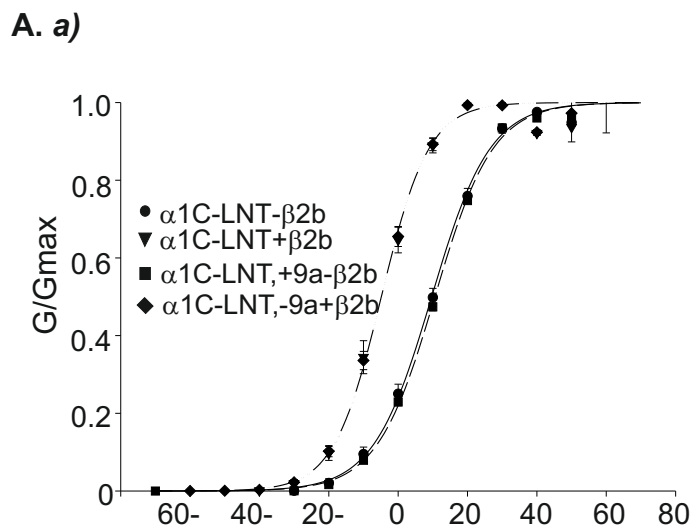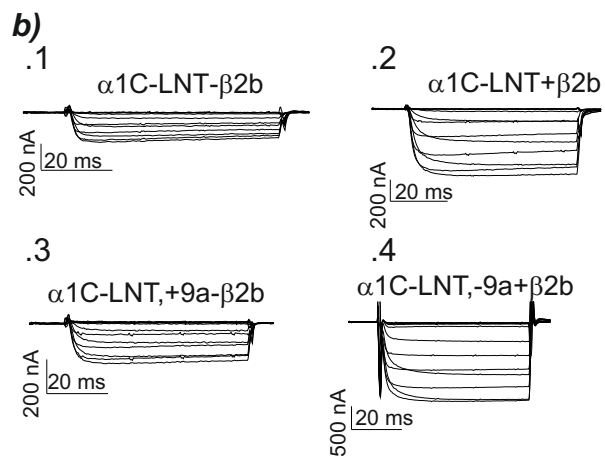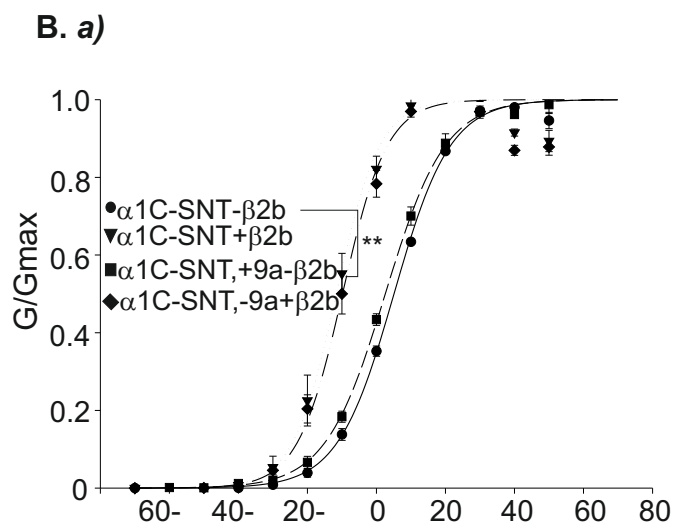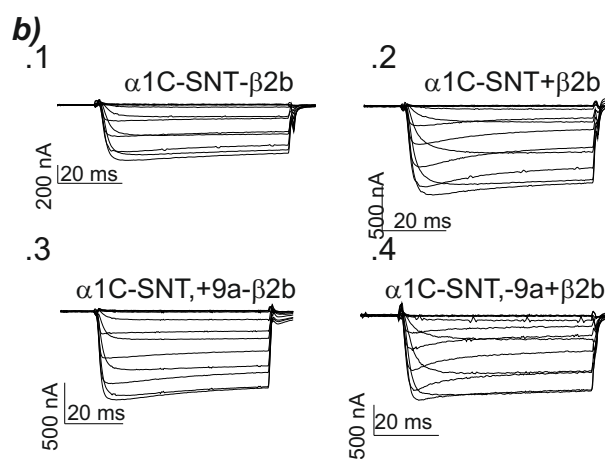

Weiss 2012. Supplemental Figure 3

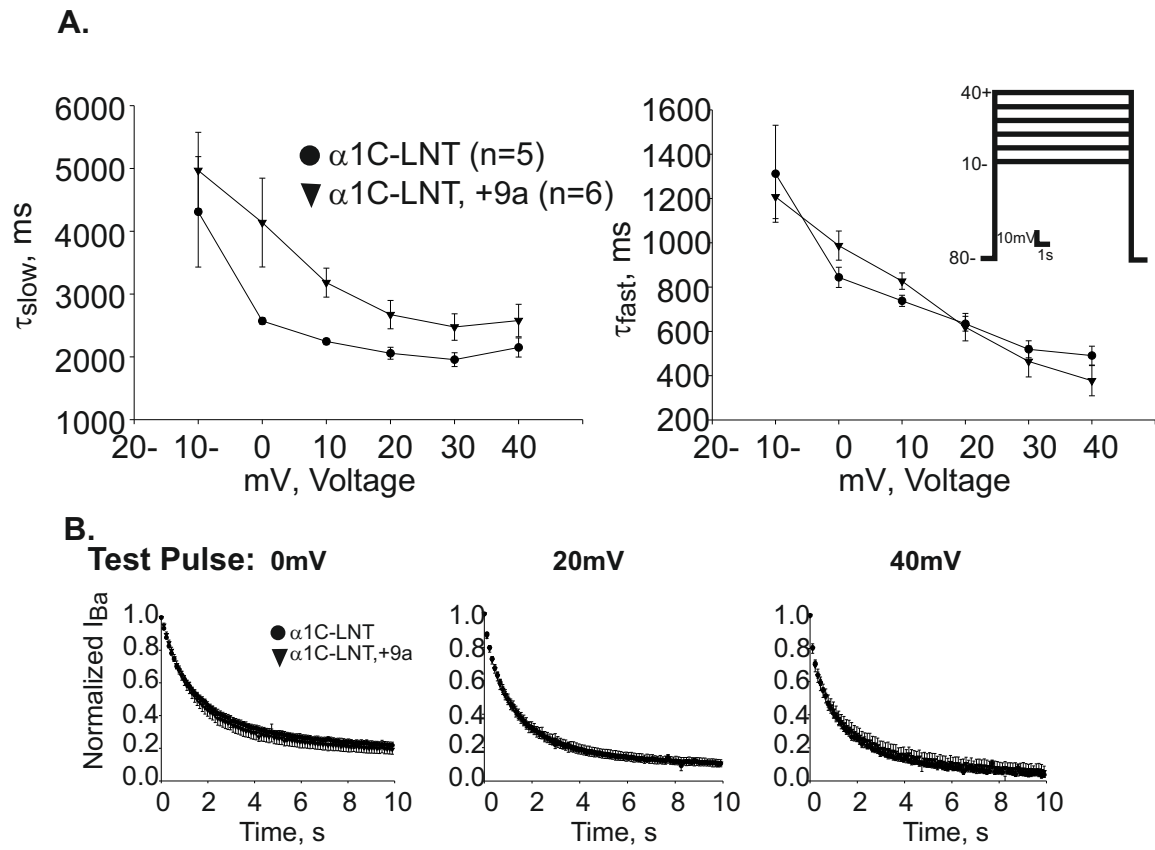

Weiss 2012. Supplemental Figure 4

## Supplemental Material

**Supplemental Table 1.** Top. Activation parameters of four  $\alpha_{1C}$  isoforms. Bottom. Inactivation parameters of two  $\alpha_{1C}$ -LNT isoforms.

**Supplemental Figure 1. The amino acid composition of rabbit long-NT.** Ser/Thr mutations are underlined: mutant 1 (mut I), single underline; mutant 2 (mut II), double underline.

**Supplemental Figure 2. A 75 nucleotide long insertion in L1 of  $\alpha_{1C}$ .** *A.* Nucleotide alignment of the L1 insertion in rabbit and the part of human chromosome 12 encoding  $\alpha_{1C}$ . *B.* a.a. alignment of the entire L1 reveals a highly homologous sequence among the different species and isoforms. Identical a.a. are marked by asterisk, gaps are marked by dashes. Only short-NT human L1 is shown, as this region is identical in human long-NT isoform.

**Supplemental Figure 3.  $\alpha_{1C,+9a}$  constructs have similar activation parameters as  $\alpha_{1C,-9a}$  constructs.** Oocytes were injected with one of four different  $\alpha_{1C}$  isoforms,  $\alpha_{2\delta}$  with or without  $\beta_{2b}$ . G-V curves of the +9a isoforms vs. their controls reveal no significant changes in activation kinetics, when expressed with or without the auxiliary  $\beta_{2b}$  subunit. *Aa)* G-V curves of long-NT isoforms. *b)* representative traces of two LNT isoforms.  $I_{Ba}$  measured at 10 mV steps from -70 mV to +50 mV. *Ba)* G-V curves of short-NT isoforms. *b)* representative traces of two SNT isoforms.  $I_{Ba}$  measured at 10 mV steps from -70 mV to +50 mV. \*\*,  $p < 0.01$  by t-test; brackets indicate the two groups with a statistical significance effect.

**Supplemental Figure 4.  $\alpha_{1C,+9a}$  constructs have similar inactivation kinetics as  $\alpha_{1C,-9a}$  constructs.** *A.* Oocytes were injected with  $\alpha_{1C}$ -LNT  $\pm 9a$ ,  $\alpha_{2\delta}$ ,  $\beta_{2b}$ . The inactivation curve was fitted with two time constants,  $\tau_{slow}$  and  $\tau_{fast}$  (see Experimental Procedures for details). There was no significant difference between the two isoforms. *Indent:* The inactivation protocol consists of 6, 10s,

incrementing voltage steps (from -10mV to +40mV). B. Representative normalized Ba<sup>2+</sup> currents at 3 selected test pulses. Each point is mean±S.E.M.  $\alpha_{1C,-9a}$  n=5;  $\alpha_{1C,+9a}$  n=6.
